# Supplementary material
Source: PubMed Central journal article supplement (PMC6453228)
Supplement: SUPPLEMENTARY_MATERIAL_654338.pdf [file SUPPLEMENTARY_MATERIAL_654338.pdf]

SUPPLEMENTARY MATERIAL

Table I. Characteristics of studies included.

| Country        | Study Author(s) and Date of Publication | Study Design                                 | Event Type | Number of patients         | Mean Age for Stroke $\pm$ SD | Ratio M:F |
|----------------|-----------------------------------------|----------------------------------------------|------------|----------------------------|------------------------------|-----------|
| <b>Bahrain</b> |                                         |                                              |            |                            |                              |           |
|                | Al-jishi et al., 2000 <sup>10</sup>     | Retrospective hospital-based                 | Stroke     | 144                        | 60                           | 1.6:1     |
|                | Al banna et al., 2015 <sup>11</sup>     | Retrospective hospital-based                 | Stroke     | 521                        | 60.5                         | 1.63:1    |
| <b>Egypt</b>   |                                         |                                              |            |                            |                              |           |
|                | Farghaly et al., 2013 <sup>12</sup>     | Cross-sectional community-based Door-to-door | Stroke     | 351                        | -                            | 1.29:1    |
|                | Kandil et al., 2006 <sup>13</sup>       | Prospective community-based Door-to-door     | Stroke     | 127 in 1992<br>825 in 2003 | -                            | 1.05:1    |
|                | El-tallawy et al., 2013 <sup>14</sup>   | Community-based Door-to-door                 | Stroke     | 130                        | -                            | 1.77:1    |
|                | Khedr et al., 2014 <sup>15</sup>        | Cross-sectional community-based Door-to-door | Stroke     | 74                         | -                            | 1.64:1    |

|                                                       |           |                                                        |                    |       |                 |        |
|-------------------------------------------------------|-----------|--------------------------------------------------------|--------------------|-------|-----------------|--------|
| Khedr et al., 2012 <sup>16</sup>                      | 2010      | Cross-sectional<br>Community-<br>based                 | Stroke             | 57    | 59.1±10.<br>8   | 1.7:1  |
| Iran                                                  |           |                                                        |                    |       |                 |        |
| Ahangar et al.,<br>2004 <sup>17</sup>                 | 2001-2003 | Retrospective<br>hospital-based                        | Stroke             | 250   | 68              | 1.08:1 |
| Ghandehari et al.,<br>2007 <sup>18</sup>              | 2001-2005 | Khorasan<br>Stroke<br>Registry<br>population-<br>based | Ischemic<br>Stroke | 1,392 | 65.61±17<br>.48 | 1:1.13 |
| Oveisgharan et al.,<br>2006 <sup>19</sup>             | 2000-2003 | Prospective<br>hospital-based                          | Stroke             | 4,361 | 68.10±13<br>.14 | 1:1.06 |
| Dehghani<br>firoozabadi et al.,<br>2013 <sup>20</sup> | 2002-2008 | Retrospective<br>hospital-based                        | Acute<br>Stroke    | 1,219 | 69.6±12.<br>9   | 1:1.09 |
| Fahimfar et al.,<br>2012 <sup>21</sup>                | 2000-2009 | Prospective<br>Population-<br>based cohort             | Stroke             | 69    | 60              | 1.46:1 |
| Azarpazhooh et al.,<br>2010 <sup>22</sup>             | 2006-2007 | Prospective<br>population-<br>based                    | Stroke             | 624   | 65.2±14.<br>6   | 1.1:1  |
| Hadaegh et al.,<br>2012 <sup>23</sup>                 | 2000-2009 | Retrospective<br>hospital-based                        | Stroke             | 72    | -               | -      |
| Delbari et al.,<br>2010 <sup>24</sup>                 | 2006-2008 | Cross-sectional<br>multihospital-<br>based             | Ischemic<br>Stroke | 953   | 68±13.82        | 1:1.04 |
| Delbari et al.,<br>2011 <sup>25</sup>                 | 2001-2002 | Cross-sectional<br>hospital-based                      | Stroke             | 460   | 69.6            | 1:1    |

|                                             |           |                              |                           |       |             |        |
|---------------------------------------------|-----------|------------------------------|---------------------------|-------|-------------|--------|
| Ghandehari et al., 2010 <sup>26</sup>       | 2006      | Prospective hospital-based   | Lacunar Stroke            | 96    | 66.78±13.91 | 1:1.18 |
| Borhani-Haghighi et al., 2013 <sup>27</sup> | 2001-2010 | Retrospective hospital-based | Stroke                    | 16351 | 63.4        | 1.16:1 |
| Togha et al., 2004 <sup>28</sup>            | 1999-2002 | Hospital-based               | Intracerebral Haemorrhage | 122   | 64.9±12.03  | 1.35:1 |
| Ghandehari et al., 2006 <sup>29</sup>       | 2000-2005 | Stroke Data Bank             | Ischemic Stroke           | 124   | 35.74±7.5   | 1.06:1 |
| Jongorbani, 1996 <sup>30</sup>              | 1992-1994 | Prospective hospital-based   | Stroke                    | 359   | 65.4±12.1   | -      |
| Parniya et al., 2006 <sup>31</sup>          | -         | Hospital-based               | Intracranial haemorrhage  | 157   | 66          | 1:1.18 |

#### Iraq

|                                     |           |                                |                 |     |            |        |
|-------------------------------------|-----------|--------------------------------|-----------------|-----|------------|--------|
| Al-mahdawi, 2005 <sup>32</sup>      | 2002      | Cross-sectional hospital-based | Ischemic Stroke | 100 | 63.57±8.31 | 2.41:1 |
| Al-heeti, 2003 <sup>33</sup>        | 1993-1998 | Hospital-based                 | Stroke          | 188 | -          | -      |
| Al-asadi et al., 2014 <sup>34</sup> | 2008      | Prospective hospital-based     | Stroke          | 225 | 63.8±12.3  | 1.27:1 |
| Awad et al., 2010 <sup>35</sup>     | 2009      | Prospective hospital-based     | Stroke          | 200 | 63.66      | 1:1.06 |

#### Israel

|                                   |                  |                              |                 |       |           |        |
|-----------------------------------|------------------|------------------------------|-----------------|-------|-----------|--------|
| Bentur et al., 2003 <sup>36</sup> | 1998-1999        | Survey hospital-based        | Stroke          | 616   | -         | -      |
| Plakht et al., 2014 <sup>37</sup> | 1988, 1996, 2006 | Retrospective hospital-based | Ischemic Stroke | 1,287 | 68.7±11.8 | 1.14:1 |

|                                             |                     |                                                       |                    |       |                 |        |
|---------------------------------------------|---------------------|-------------------------------------------------------|--------------------|-------|-----------------|--------|
| Tanne et al., 2006 <sup>38</sup>            | 2004                | Prospective<br>Survey                                 | Stroke             | 2,174 | 71±13           | 1.13:1 |
| Jordan                                      |                     |                                                       |                    |       |                 |        |
| Bahou et al., 2004 <sup>39</sup>            | 2000-2002           | Retrospective<br>hospital-based                       | Ischemic<br>Stroke | 200   | 61.2            | 1.3:1  |
| Kuwait                                      |                     |                                                       |                    |       |                 |        |
| Ashkanani et al.,<br>2013 <sup>40</sup>     | 2008                | Retrospective<br>hospital-based                       | Stroke             | 151   | 60.5            | 1.75:1 |
| Al-shammri et al.,<br>2003 <sup>41</sup>    | 1995-1999           | Retrospective<br>hospital-based                       | Ischemic<br>Stroke | 62    | 64.1±13.<br>2   | 1:1.06 |
| Abdul-ghaffar et al.,<br>1997 <sup>42</sup> | 1989,<br>1992, 1993 | Prospective<br>hospital-based                         | Stroke             | 241   | -               | -      |
| Lebanon                                     |                     |                                                       |                    |       |                 |        |
| Riachy et al., 2008 <sup>43</sup>           | 2000-2004           | Retrospective<br>and<br>Prospective<br>hospital-based | Acute<br>Stroke    | 62    | 65.8±12.<br>3   | 1:1    |
| Palestine                                   |                     |                                                       |                    |       |                 |        |
| Sweileh et al.,<br>2008 <sup>44</sup>       | 2006-2007           | Prospective<br>hospital-based                         | Stroke             | 186   | 69.09±10<br>.9  | 1:1.04 |
| Sawalha, 2009 <sup>45</sup>                 | 2006-2007           | Retrospective<br>hospital-based                       | Ischemic<br>Stroke | 153   | 69.08±11<br>.15 | 1:1.19 |
| Qatar                                       |                     |                                                       |                    |       |                 |        |
| Khan et al., 2008 <sup>46</sup>             | 2004-2005           | Prospective<br>hospital-based                         | Stroke             | 270   | 57.1±13.<br>3   | 2.7:1  |
| Hamad et al., 2001 <sup>47</sup>            | 1997                | Retrospective<br>hospital-based                       | Stroke             | 217   | 57              | 2.61:1 |
| Christos et al.,<br>2013 <sup>48</sup>      | 2006-2008           | Case-control<br>hospital-based                        | Stroke             | 262   | 58±12.9         | 4.35:1 |

|                                   |           |                                 |                         |     |                |       |
|-----------------------------------|-----------|---------------------------------|-------------------------|-----|----------------|-------|
| Khan, 2007 <sup>49</sup>          | 2004-2005 | Prospective<br>hospital-based   | Ischemic<br>Stroke      | 40  | 37.1±13.<br>27 | 4:1   |
| Akhtar et al., 2009 <sup>50</sup> | 2005-2008 | Prospective<br>hospital-based   | Ischemic<br>Stroke      | 116 | 53±16          | 5.7:1 |
| Nogueira, 1992 <sup>51</sup>      | 1983-1988 | Retrospective<br>hospital-based | Subarachn<br>oid Stroke | 44  | -              | 3:1   |
| Deleu et al., 2006 <sup>52</sup>  | 2001      | Retrospective<br>hospital-based | Ischemic<br>Stroke      | 303 | 67.3           | 2.6:1 |

#### Saudi Arabia

|                                        |                    |                                                       |        |      |               |        |
|----------------------------------------|--------------------|-------------------------------------------------------|--------|------|---------------|--------|
| Qari, 2000 <sup>53</sup>               | 1997-2000          | Retrospective<br>hospital-based                       | Stroke | 71   | 63            | 3.4:1  |
| Al rajeh et al.,<br>1993 <sup>54</sup> | 1982-1992          | Retrospective<br>hospital-based                       | Stroke | 500  | 63±17         | 2.16:1 |
| Akbar et al., 2001 <sup>55</sup>       | 1995-1999          | Retrospective<br>hospital-based                       | Stroke | 103  | 66            | -      |
| Al-rajeh et al.,<br>1989 <sup>56</sup> | -                  | Clinical Study<br>hospital-based                      | Stroke | 99   | -             | 2.2:1  |
| Yacub et al., 1991 <sup>57</sup>       | 1984-1989          | Retrospective<br>hospital-based                       | Stroke | 200  | -             | 1.4:1  |
| Al-rajeh et al.,<br>1991 <sup>58</sup> | -                  | Hospital-based                                        | Stroke | 372  | -             | 2.2:1  |
| Awada et al., 1999 <sup>59</sup>       | 1982-1999          | Retrospective<br>and<br>Prospective<br>hospital-based | Stroke | 1000 | 59            | 2.1:1  |
| El sayed et al.,<br>1999 <sup>60</sup> | 1994-1996          | Prospective<br>hospital-based                         | Stroke | 329  | 62.8±11.<br>1 | 1:1    |
| Al-rajeh et al.,<br>1998 <sup>61</sup> | 1989-90<br>1991-93 | Register                                              | Stroke | 488  | -             | 1.8:1  |

|                                        |           |                                 |                                      |       |               |        |
|----------------------------------------|-----------|---------------------------------|--------------------------------------|-------|---------------|--------|
| Qutub, 2001 <sup>62</sup>              | 1996-1998 | Descriptive<br>hospital-based   | Ischemic<br>Stroke                   | 25    | 61.2±2.6      | 1:1.7  |
| Al rajeh, 1994 <sup>63</sup>           | -         | Retrospective<br>hospital-based | Stroke                               | 797   | -             | 2.27:1 |
| Awada et al., 1998 <sup>64</sup>       | 1981-1995 | Retrospective<br>hospital-based | Intracerebr<br>al<br>haemorrha<br>ge | 107   | 28.6±11.<br>7 | 1.81:1 |
| Awada et al., 1996 <sup>65</sup>       | 1981-1994 | Retrospective<br>hospital-based | Cerebral<br>haemorrha<br>ge          | 243   | 56.9±18.<br>2 | 2.74:1 |
| Awada 1994 <sup>66</sup>               | 1981-1993 | Retrospective<br>hospital-based | Stroke                               | 120   | 33            | 1.73:1 |
| Ayoola et al., 2003 <sup>67</sup>      | 1997-1998 | Retrospective<br>hospital-based | Stroke                               | 241   | 64.5          | 1.54:1 |
| Turkey                                 |           |                                 |                                      |       |               |        |
| Balci et al., 2011 <sup>68</sup>       | 2003-2009 | Retrospective<br>hospital-based | Ischemic<br>Stroke                   | 192   | -             | -      |
| Turkey, 2012 <sup>69</sup>             | 2010-2011 | Retrospective<br>hospital-based | Stroke                               | 140   | 64±5          | 1.8:1  |
| Yesilot et al., 2011 <sup>70</sup>     | 1994-2004 | Prospective<br>hospital-based   | Acute<br>Stroke                      | 1,842 | 63.6±14.<br>6 | 1.04:1 |
| United Arab Emirates                   |           |                                 |                                      |       |               |        |
| McLachlan, 2002 <sup>71</sup>          | -         | -                               | Stroke                               | 63    | -             | -      |
| Mirghani et al.,<br>2010 <sup>72</sup> | 2007-2009 | Retrospective<br>hospital-based | Ischemic<br>stroke                   | 171   | 70            | 1.08:1 |
| Yemen                                  |           |                                 |                                      |       |               |        |
| Sallam et al., 2009 <sup>73</sup>      | 1999-2003 | Retrospective<br>hospital-based | Stroke                               | 505   | 59.6          | 1.67:1 |

---

SD indicates Standard deviation

Figure I.

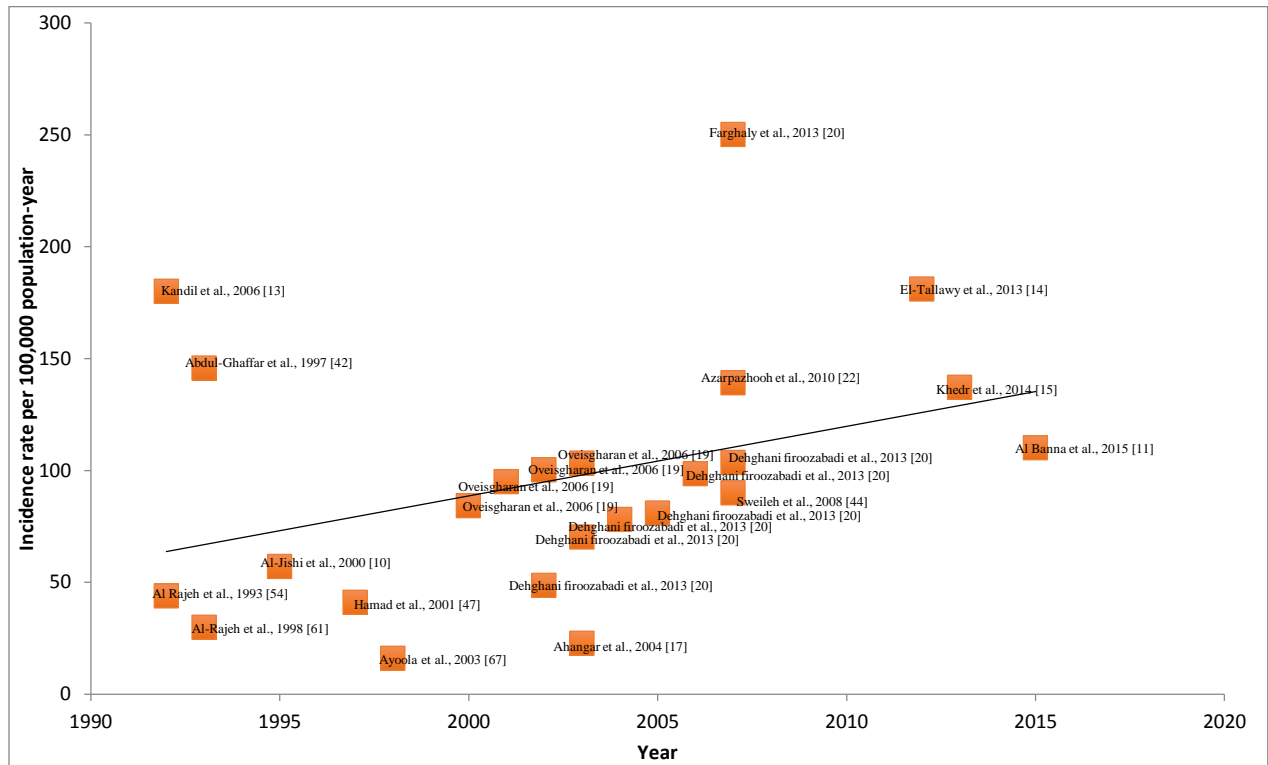

Figure I. Incidence rate for first ever/first ever and recurrent stroke by study year for studies including all age ranges patients or patients  $\geq 18$  years old. For studies not stating the year of the stroke incidence rate, the last year of the study period was considered. Solid line is a line of best fit.

Figure IIA

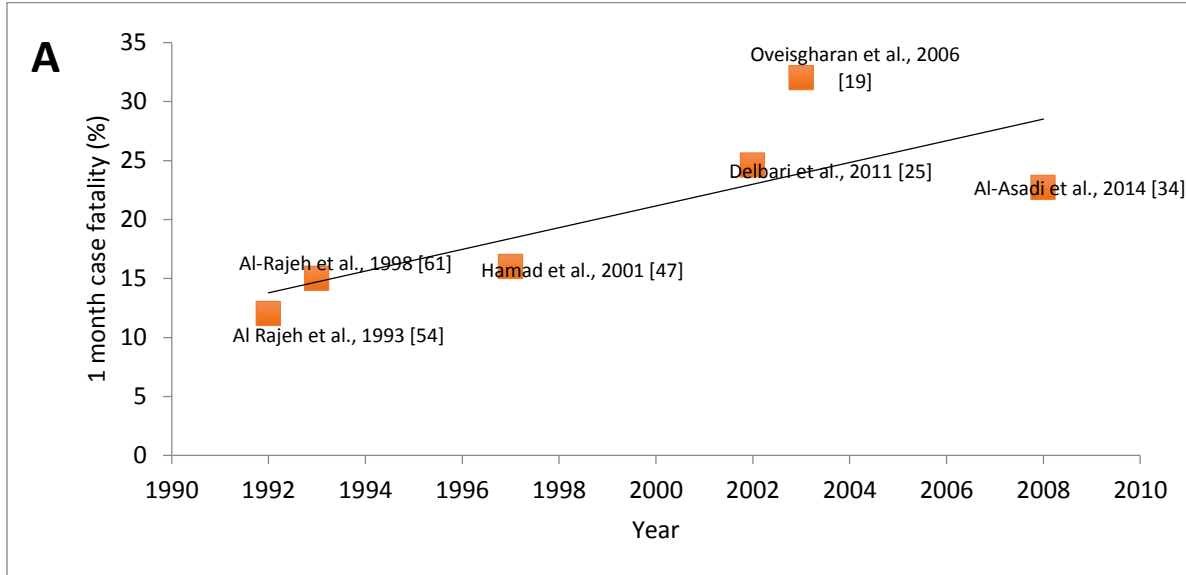

Figure IIA. Early (28-day to 1 month) stroke case fatality by study year. For studies not stating the year of the stroke fatality rate, the last year of the study period was considered. Solid line is a line of best fit.

Figure IIB

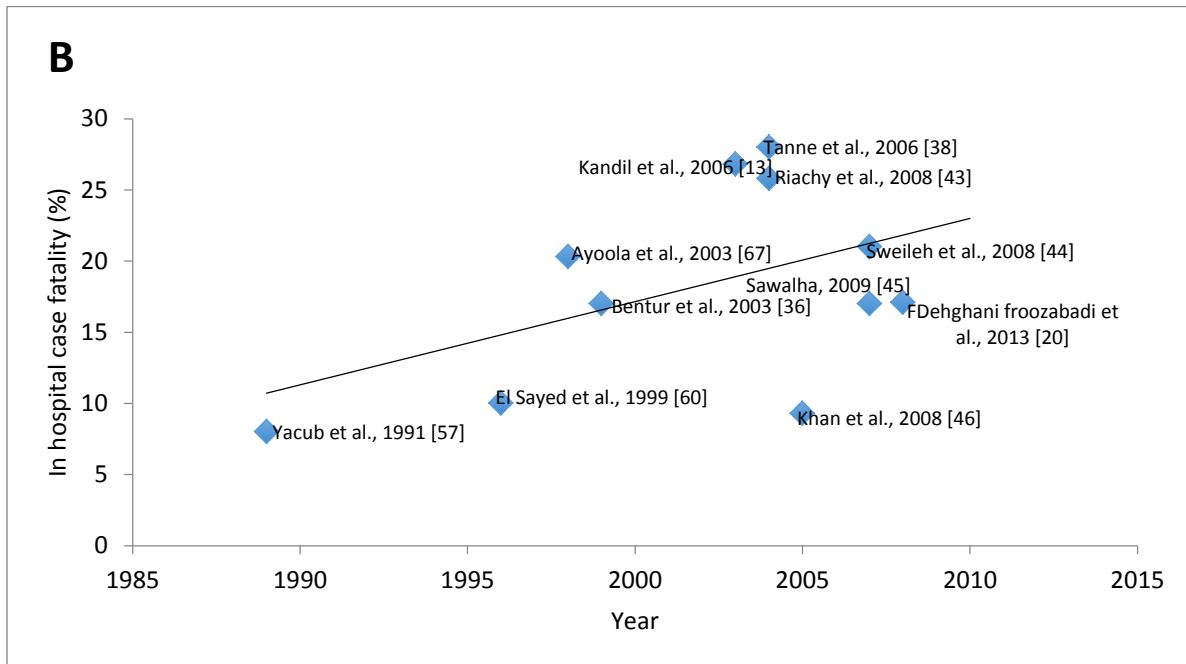

Figure IIB. In hospital stroke case fatality by study year. For studies not stating the year of the stroke fatality rate, the last year of the study period was considered. Solid line is a line of best fit.
